# Supplementary material for: Structural and Functional Insights into the Pilotin-Secretin Complex of the Type II Secretion System
Source: PLoS Pathog. 2012 Feb 9;8(2):e1002531. doi: 10.1371/journal.ppat.1002531 (PMC3276575; doi:10.1371/journal.ppat.1002531)
Supplement: Table S2 — Crystallographic data and refinement statistics for pilotin/secretin peptide complex. (DOC) [file ppat.1002531.s008.doc]

| **Table S2.** Crystallographic data and refinement statistics for pilotin/secretin peptide complex | |
| --- | --- |
| *Data Collection* |  |
| Space group | P65† |
| Cell edges(Å) | *a =91.9, c=141.6* |
| Molecules per asymmetric unit | 4 |
| Wavelength (Å) | 1.0718 |
| Resolution (Å) | 46.55–2.00 (2.16–2.00) a |
| Number of unique reflections | 46764 (6813) a |
| Multiplicity | 5.4 (5.4) a |
| Completeness (%) | 99.8 (99.8) a |
| Rmerge (%)b | 0.098 (0.354)a |
| Mean I/sigma (I) | 13.3 (3.4) a |
| Rpim (%)c | 0.046 (0.169) a |
| Wilson B-factor ( Å2) | 17.1 |
| *Refinement* |  |
| Resolution limits (Å) | 23.22 – 2.00 |
| Reflections (work/test) | 44205/2377 |
| R-factor/R-freed (%) | 0.243/0.279 |
| rmsd bond(Å) /angle (°) | 0.006/0.949 |
| Number of protein (solvent) atoms | 3401 (996)‡ |
| Ramachandran plot statistics (%) |  |
| Residues in most favoured regions | 93.1% |
| Residues in additional allowed regions | 6.9% |
| aThe parameter values for the range 2.16-2.00Å are given in parentheses. b Rmerge = Σhkl Σi |Ii - <I> | /_Σhkl ΣIi, where Ii is the intensity of the ith observation, <I> is the mean intensity of the reflection, and the summations extend over all unique reflections (hkl) and all equivalents (i), respectively. c Rpim = Σhkl [n/(n-1)]1/2 Σi |Ii(hkl) - <I(hkl) >| / Σhkl Σi Ii(hkl), where n is the multiplicity, other variables as defined for Rmerge [46]. dR-factor = Σhkl |Fo – Fc | / Σhkl Fo, where Fo and Fc represent the observed and calculated structure factors, respectively. The R-Factor is calculated using 95% of the data included in refinement and R-free the 5% excluded. †The space group appears to be P6522, but twinning is indicated in the cumulative intensity distribution. The data can be more successfully refined in P65 with the twinning operator: h, -h-k, -l. Using the lower symmetry space group, P32 with twinning operators, does not further facilitate refinement of the structure. ‡The disordered protein detected in the solvent channels was modelled using water molecules which is why the number of solvent atoms is high. The presence of disordered density in the solvent channel is far from ideal and the density became no clearer in lower symmetry space groups, but the original map and the simulated annealed omit map shown in Figure 3C does provide evidence for the structure of the bound secretin peptide. | |
